# Supplementary material for: PSAT1 is regulated by ATF4 and enhances cell proliferation via the GSK3β/β-catenin/cyclin D1 signaling pathway in ER-negative breast cancer
Source: PubMed Central journal article supplement (PMC5721480; doi:10.1186/s13046-017-0648-4), 2017-12-08

**A**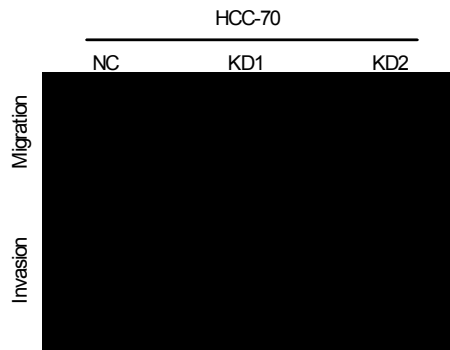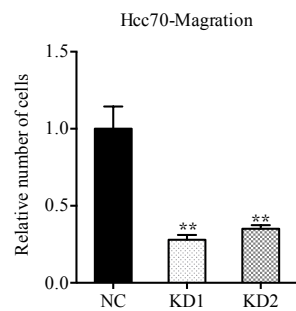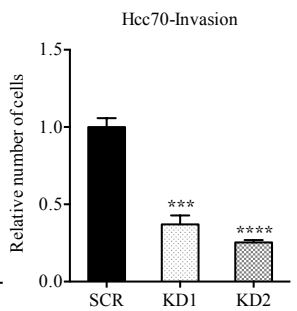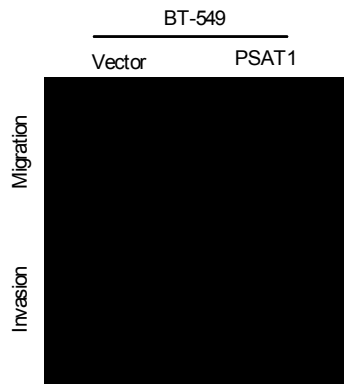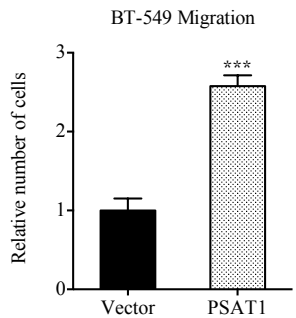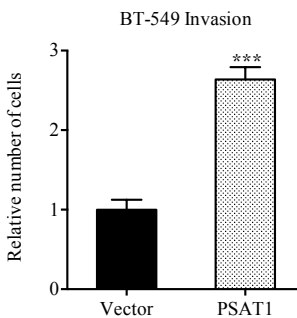**B**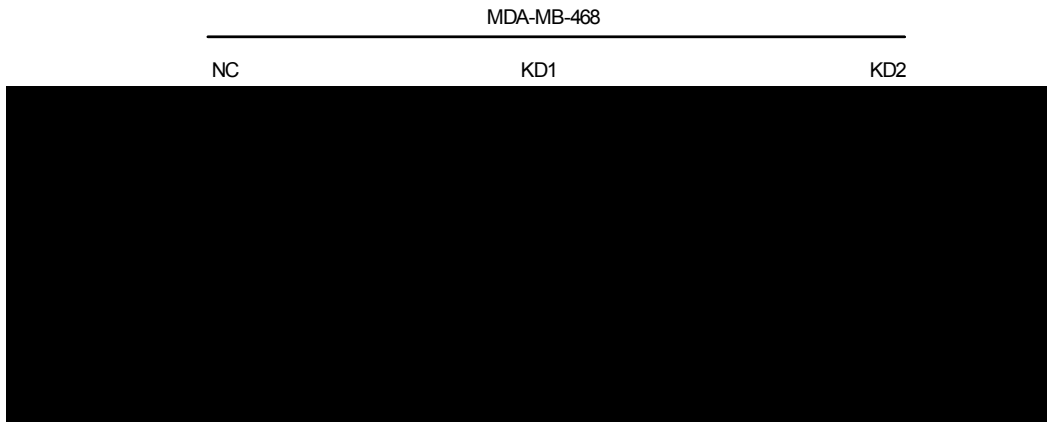

Supplement: 13046_2017_648_MOESM2_ESM.pdf [file 13046_2017_648_MOESM2_ESM.pdf]
