# Supplementary material for: PSAT1 is regulated by ATF4 and enhances cell proliferation via the GSK3β/β-catenin/cyclin D1 signaling pathway in ER-negative breast cancer
Source: J Exp Clin Cancer Res. 2017 Dec 8;36:179. doi: 10.1186/s13046-017-0648-4 (PMC5721480; doi:10.1186/s13046-017-0648-4)
Supplement: Supplementary file 1 — Patients’ clinicopathological characteristics. (XLSX 58 kb) [file 13046_2017_648_MOESM1_ESM.xlsx]

## Sheet: 工作表1
ID	Score	Life(month)	Death	Age	Tumor size(cm)	Number oflymph node metastasis	TNM stage	Histologic grade	Her-2 status	ki67 status	P53 status
600108	Positive	80	No	48	4	0	II	II	Negative	Positive	Positive
600145	Positive	82	No	45	4	0	II	II	Positive	Positive	Positive
600147	Positive	80	No	55	2	0	I	II	Negative	Positive	Positive
600180	Positive	80	No	42	3	3	II	II	Negative	Negative	Positive
600185	Positive	80	No	45	0.5	0	I	II	Negative	Negative	Positive
600254	Positive	80	No	45	2	0	I	II	Negative	Negative	Positive
600354	Negative	80	No	56	2	0	II	II	Negative	Negative	Positive
600456	Positive	82	No	44	5	0	II	II	Positive	Negative	Positive
600507	Positive	80	No	37	4	0	II	III	Negative	Positive	Positive
600539	Negative	80	No	55	2	12	III	II	Positive	Negative	Positive
600653	Positive	25	Yes	54	3.5	24	III	II	Positive	Positive	Positive
600675	Positive	80	No	45	1.5	0	I	I	Negative	Positive	Positive
600708	Positive	35	Yes	57	1.5	1	II	III	Negative	Negative	Positive
600735	Positive	65	Yes	53	2.5	3	II	III	Positive	Positive	Positive
600736	Negative	80	No	32	3	9	III	I	Positive	Positive	Positive
600835	Positive	79	No	58	2	0	I	II	Positive	Negative	Positive
600885	Positive	79	No	44	3	0	II	III	Positive	Negative	Positive
600888	Positive	19	Yes	49	4	13	III	III	Positive	Positive	Positive
601068	Positive	79	No	50	6	4	III	III	Negative	Positive	Negative
601134	Positive	79	No	38	3	2	II	III	Negative	Positive	Positive
601338	Positive	67	Yes	42	4	7	III	II	Negative	Negative	Positive
601627	Positive	79	No	49	3	0	II	I	Positive	Positive	Positive
601709	Positive	81	No	69	2	0	I	III	Negative	Negative	Positive
601921	Positive	80	No	48	2.5	8	III	II	Negative	Positive	Positive
601926	Positive	79	No	41	6	7	III	III	Positive	Positive	Positive
601935	Positive	78	No	35	1	1	II	III	Negative	Positive	Positive
601978	Positive	78	No	50	3	0	II	III	Negative	Negative	Positive
601983	Positive	78	No	34	3	0	II	II	Positive	Positive	Positive
602025	Negative	78	No	50	2	0	II	III	Negative	Negative	Positive
602026	Positive	78	No	34	1.5	2	II	III	Negative	Positive	Positive
602100	Positive	80	No	50	3	0	II	III	Negative	Positive	Positive
602103	Positive	78	No	56	1.9	3	II	III	Negative	Negative	Positive
602104	Negative	78	No	36	2	0	II	III	Negative	Negative	Positive
602155	Positive	78	No	52	5	15	III	II	Positive	Positive	Negative
602218	Positive	78	No	49	3	21	III	III	Positive	Positive	Positive
602267	Positive	78	No	43	3	0	II	II	Negative	Negative	Positive
602319	Positive	78	No	41	3.5	3	II	III	Negative	Negative	Positive
602323	Negative	78	No	34	2	0	II	III	Negative	Positive	Positive
602389	Negative	78	No	61	1	0	I	III	Negative	Negative	Negative
602395	Negative	80	No	65	1	5	III	III	Positive	Positive	Positive
602472	Positive	78	No	44	3	4	III	III	Negative	Negative	Positive
602661	Positive	78	No	50	2.5	2	II	III	Negative	Negative	Negative
602662	Positive	30	Yes	35	4	15	III	III	Negative	Positive	Positive
602729	Positive	80	No	57	2.5	4	III	III	Negative	Negative	Positive
602798	Positive	78	No	49	2	0	I	II	Negative	Positive	Positive
602973	Negative	78	No	53	1.5	0	I	III	Negative	Negative	Positive
602992	Negative	78	No	50	2	0	I	III	Negative	Negative	Positive
603163	Positive	13	Yes	39	2.3	25	III	III	Negative	Positive	Negative
603206	Positive	56	Yes	42	2.5	7	III	II	Negative	Negative	Positive
603220	Negative	78	No	40	2	0	II	II	Positive	Positive	Positive
603352	Negative	54	Yes	62	5	1	II	III	Negative	Positive	Positive
603368	Positive	77	No	56	1.5	0	I	III	Negative	Negative	Positive
603544	Positive	77	No	45	3	0	II	III	Negative	Positive	Positive
603576	Positive	78	No	43	0	0	I	II	Negative	Negative	Positive
603634	Negative	37	Yes	45	3	4	III	III	Positive	Positive	Positive
603689	Negative	77	No	41	2	0	II	II	Negative	Positive	Positive
603750	Negative	77	No	45	2.5	10	III	II	Negative	Negative	Positive
603752	Positive	77	No	68	4	3	II	II	Negative	Positive	Positive
603789	Negative	56	Yes	67	5	10	III	III	Negative	Positive	Negative
603853	Negative	77	No	41	2	1	II	III	Negative	Positive	Positive
603888	Positive	77	No	60	2	0	I	III	Positive	Positive	Positive
604028	Negative	77	No	54	2	17	III	III	Negative	Negative	Positive
604064	Negative	77	No	45	0.5	0	I	I	Negative	Negative	Positive
604072	Negative	77	No	43	5.1	3	III	III	Negative	Positive	Positive
604190	Negative	77	No	52	2	0	II	III	Negative	Negative	Negative
604191	Positive	77	No	52	2.4	0	II	III	Positive	Positive	Positive
604214	Positive	11	Yes	42	1.4	33	III	III	Positive	Positive	Positive
604234	Positive	26	Yes	36	4	3	II	III	Negative	Negative	Positive
604254	Positive	77	No	52	1.8	0	I	II	Negative	Positive	Negative
604260	Negative	77	No	48	2.5	1	II	III	Negative	Negative	Positive
604263	Negative	77	No	48	1.1	0	I	III	Negative	Negative	Negative
604368	Negative	77	No	44	3	6	III	III	Negative	Positive	Positive
604392	Negative	52	Yes	59	3	3	II	III	Negative	Negative	Positive
604442	Negative	78	No	58	3	5	III	III	Negative	Negative	Positive
604480	Positive	78	No	46	3	9	III	III	Negative	Positive	Negative
604486	Positive	77	No	47	1.8	2	II	III	Negative	Negative	Positive
604487	Positive	77	No	55	4	3	II	III	Positive	Positive	Positive
604574	Positive	77	No	50	3	1	II	III	Negative	Negative	Positive
604577	Positive	49	Yes	58	3	2	II	III	Negative	Positive	Positive
604611	Negative	77	No	49	2.8	3	II	III	Negative	Positive	Positive
604727	Positive	76	No	49	2	0	I	III	Negative	Positive	Positive
604753	Positive	76	No	57	2.5	0	II	II	Negative	Negative	Positive
604757	Negative	76	No	50	1.5	1	II	III	Positive	Negative	Positive
604799	Positive	77	No	53	2.5	0	II	III	Positive	Positive	Negative
604870	Positive	37	Yes	34	2	7	III	III	Negative	Positive	Positive
604918	Negative	76	No	39	2	0	II	III	Negative	Negative	Negative
604978	Positive	76	No	53	1.6	0	I	II	Negative	Positive	Positive
604980	Negative	76	No	58	2	0	II	III	Negative	Negative	Negative
605073	Positive	77	No	41	1.5	2	II	II	Negative	Negative	Negative
605264	Negative	76	No	43	2	9	III	II	Negative	Negative	Positive
605267	Negative	77	No	53	8	6	III	III	Negative	Positive	Negative
605273	Negative	65	Yes	51	5	12	III	III	Positive	Negative	Positive
605314	Positive	76	No	50	2.5	2	II	III	Negative	Positive	Positive
605315	Positive	77	No	50	2	1	II	III	Negative	Positive	Positive
605334	Positive	27	Yes	68	4	3	II	III	Negative	Negative	Positive
605385	Negative	76	No	49	1	0	I	III	Negative	Negative	Positive
605421	Positive	17	Yes	43	3	1	II	III	Negative	Positive	Positive
605501	Positive	76	No	42	6	0	II	III	Negative	Positive	Negative
605503	Positive	76	No	45	1	0	I	III	Negative	Positive	Positive
605506	Negative	16	Yes	65	2	35	III	III	Negative	Negative	Positive
605544	Positive	76	No	47	2.4	2	II	III	Negative	Positive	Positive
605612	Positive	76	No	40	1.5	1	II	III	Negative	Positive	Positive
605645	Positive	77	No	69	2.5	0	II	III	Negative	Negative	Positive
605646	Positive	76	No	54	3	2	II	III	Negative	Positive	Negative
605694	Positive	76	No	43	2.5	4	III	III	Negative	Negative	Negative
605696	Positive	76	No	55	4	7	III	III	Negative	Positive	Positive
605789	Positive	76	No	45	3	0	II	III	Negative	Negative	Negative
605834	Positive	76	No	73	3	4	III	III	Positive	Positive	Positive
605898	Positive	75	No	55	3	0	II	III	Negative	Negative	Positive
605922	Negative	75	No	52	2	0	II	III	Negative	Positive	Positive
605942	Positive	36	Yes	61	2	0	I	III	Positive	Positive	Positive
605977	Positive	75	No	39	3	5	III	II	Negative	Positive	Positive
606018	Negative	75	No	52	2	0	II	III	Negative	Negative	Positive
606030	Negative	75	No	56	2.5	4	III	III	Negative	Negative	Negative
606090	Positive	76	No	50	2.5	0	II	II	Negative	Negative	Positive
606095	Negative	75	No	41	3.5	0	II	II	Negative	Negative	Negative
606109	Positive	16	Yes	38	7	11	III	II	Positive	Negative	Positive
606113	Negative	57	Yes	72	2	0	II	I	Negative	Negative	Negative
606126	Negative	42	Yes	30	5	7	III	III	Positive	Positive	Positive
606186	Positive	75	No	63	4	38	III	III	Positive	Positive	Positive
606187	Negative	75	No	48	1.5	0	I	III	Negative	Negative	Negative
606306	Positive	75	No	51	3	0	II	III	Positive	Positive	Negative
606442	Negative	75	No	60	2.5	5	III	III	Negative	Positive	Positive
606670	Negative	75	No	50	5	0	II	III	Negative	Negative	Positive
606713	Positive	75	No	51	3	17	III	II	Negative	Positive	Negative
606776	Positive	75	No	42	3	0	II	III	Negative	Negative	Positive
606782	Positive	75	No	43	4	0	II	I	Positive	Negative	Positive
606833	Positive	75	No	35	2.2	2	II	I	Negative	Positive	Positive
606842	Negative	75	No	58	2	1	II	III	Negative	Negative	Negative
606866	Negative	75	No	49	2	0	I	III	Negative	Negative	Negative
606961	Negative	75	No	42	3.5	0	II	I	Negative	Negative	Positive
607116	Negative	75	No	60	3.1	28	III	III	Negative	Negative	Negative
607162	Positive	75	No	54	2.5	1	II	II	Positive	Positive	Positive
607578	Negative	71	No	48	3.5	6	III	II	Positive	Positive	Positive
607579	Negative	74	No	73	4	2	II	III	Negative	Negative	Negative
607581	Positive	74	No	59	4.6	0	II	I	Positive	Negative	Positive
607626	Negative	66	No	45	2.6	5	III	III	Negative	Negative	Positive
607627	Negative	65	Yes	39	3	0	II	III	Negative	Negative	Positive
607672	Negative	74	No	44	4	10	III	II	Negative	Negative	Positive
607737	Positive	75	No	47	2	3	II	III	Negative	Positive	Positive
607738	Positive	74	No	48	3	2	II	III	Negative	Positive	Positive
607790	Negative	74	No	49	3	1	II	II	Negative	Positive	Positive
607842	Negative	74	No	43	3.8	0	II	III	Negative	Positive	Positive
607926	Negative	74	No	43	4.2	0	II	III	Negative	Negative	Negative
608029	Negative	74	No	60	2.7	0	II	III	Negative	Negative	Positive
608033	Negative	74	No	38	3	0	II	III	Negative	Positive	Negative
608083	Positive	45	Yes	67	3	21	III	III	Positive	Positive	Negative
608086	Negative	74	No	44	1.8	1	II	II	Negative	Negative	Positive
608146	Negative	74	No	53	2.6	10	III	III	Negative	Negative	Positive
608147	Negative	74	No	41	4	0	II	III	Negative	Negative	Positive
608246	Negative	74	No	53	2.3	0	II	III	Positive	Positive	Positive
608269	Negative	74	No	30	3	8	III	II	Positive	Positive	Positive
608365	Positive	65	No	48	3.2	0	II	III	Negative	Negative	Positive
608367	Positive	73	No	52	2.5	0	II	II	Negative	Negative	Positive
608369	Negative	37	Yes	55	4	12	III	III	Negative	Positive	Positive
608461	Positive	3	Yes	60	4.1	21	III	III	Negative	Positive	Positive
608532	Negative	73	No	52	1.7	0	I	II	Negative	Negative	Positive
608879	Positive	73	No	51	2.2	0	II	II	Negative	Positive	Negative
608934	Negative	73	No	50	2	0	I	III	Negative	Positive	Positive
608990	Negative	73	No	41	3	2	II	III	Negative	Negative	Positive
609057	Positive	10	Yes	55	4	20	III	III	Negative	Positive	Positive
609059	Positive	73	No	40	3	0	II	III	Negative	Positive	Negative
609090	Positive	73	No	28	2	3	II	III	Positive	Positive	Positive
609197	Negative	73	No	52	5	0	II	II	Negative	Negative	Negative
609301	Negative	73	No	49	3	0	II	II	Negative	Negative	Positive
609302	Negative	73	No	68	1.6	3	II	III	Negative	Negative	Negative
609387	Positive	73	No	46	3	6	III	II	Positive	Positive	Positive
609500	Positive	73	No	42	3.1	18	III	III	Negative	Positive	Negative
609636	Positive	75	No	48	3.5	0	II	II	Negative	Positive	Negative
609710	Positive	74	No	46	1.9	1	II	II	Positive	Positive	Negative
609718	Negative	72	No	49	1.5	9	III	III	Negative	Negative	Negative
609719	Positive	52	Yes	68	3	0	II	III	Negative	Positive	Negative
609912	Positive	72	No	50	3.7	5	III	III	Negative	Positive	Negative
609931	Negative	74	No	48	2.2	27	III	III	Negative	Negative	Positive
609964	Negative	72	No	44	1.9	1	II	III	Positive	Negative	Positive
609995	Positive	72	No	44	3	0	II	I	Negative	Negative	Negative
610100	Positive	72	No	56	3.2	7	III	II	Negative	Negative	Positive
610138	Positive	72	No	58	1.1	0	I	III	Negative	Positive	Negative
610267	Negative	72	No	48	1.9	0	I	III	Negative	Positive	Positive
610277	Positive	72	No	48	2.3	0	II	III	Negative	Negative	Negative
610385	Negative	72	No	39	2.6	0	II	III	Negative	Negative	Positive
610388	Positive	74	No	47	3	0	II	I	Positive	Negative	Positive
610395	Positive	18	Yes	48	3	6	III	III	Negative	Positive	Negative
610423	Positive	72	No	43	1.6	1	II	III	Negative	Positive	Positive
610501	Positive	72	No	47	2	0	I	I	Positive	Positive	Positive
610504	Positive	72	No	39	1.5	1	II	II	Negative	Negative	Positive
610527	Positive	72	No	40	1.2	0	I	II	Negative	Positive	Positive
610558	Positive	72	No	53	2.2	0	II	I	Positive	Negative	Positive
610567	Negative	72	No	44	2.6	24	III	III	Negative	Positive	Positive
610568	Negative	74	No	57	2.9	0	II	II	Negative	Positive	Positive
610615	Negative	72	No	52	2.2	0	II	III	Positive	Positive	Positive
610686	Negative	74	No	39	1.5	0	I	III	Negative	Negative	Negative
610747	Negative	72	No	40	4	0	II	III	Negative	Positive	Negative
610799	Negative	72	No	43	4	5	III	III	Positive	Positive	Negative
610878	Positive	72	No	66	3	12	III	II	Positive	Positive	Negative
611102	Positive	71	No	40	2.7	1	II	III	Negative	Positive	Positive
612023	Positive	12	Yes	44	5.7	22	III	III	Positive	Positive	Positive
612290	Negative	70	No	37	1	0	I	III	Negative	Positive	Positive
612526	Negative	35	Yes	52	5	19	III	III	Positive	Negative	Negative
612533	Negative	70	No	38	3	0	II	III	Negative	Negative	Positive
612608	Positive	23	Yes	46	6	0	II	II	Negative	Positive	Positive
612729	Negative	70	No	46	1.7	26	III	III	Negative	Negative	Positive
612731	Positive	31	Yes	44	6	34	III	II	Negative	Positive	Negative
612761	Positive	71	No	38	1.5	0	I	III	Negative	Negative	Positive
612780	Positive	70	No	54	1	0	I	III	Positive	Positive	Positive
612898	Negative	70	No	43	1.8	0	I	II	Negative	Positive	Negative
612902	Negative	72	No	50	4	0	II	III	Negative	Positive	Positive
612910	Positive	72	No	72	2	1	II	III	Positive	Positive	Positive
612937	Positive	25	Yes	55	2.5	0	II	II	Positive	Positive	Negative
612966	Positive	71	No	47	3	11	III	III	Negative	Negative	Positive
613024	Positive	70	No	52	2.4	0	II	I	Positive	Positive	Positive
613110	Positive	70	No	47	6	0	II	I	Positive	Negative	Positive
613112	Negative	58	Yes	52	3	8	III	III	Negative	Negative	Negative
613161	Negative	70	No	49	4.2	19	III	III	Negative	Negative	Positive
613168	Negative	35	Yes	41	8	22	III	II	Positive	Negative	Negative
613474	Negative	69	No	50	3.4	0	II	II	Negative	Negative	Positive
613484	Negative	69	No	37	2.4	1	II	I	Positive	Negative	Positive
613573	Negative	69	No	43	1.8	0	I	I	Negative	Negative	Positive
613842	Negative	71	No	42	2.8	4	III	III	Negative	Negative	Positive
613948	Negative	69	No	36	3	1	II	III	Negative	Positive	Positive
700722	Positive	74	No	56	2	22	III	II	Negative	Positive	Positive
700895	Positive	74	No	52	5	6	III	II	Negative	Positive	Positive
700993	Positive	44	Yes	38	3	2	II	II	Negative	Positive	Negative
701084	Positive	74	No	56	3	0	II	II	Negative	Positive	Negative
701178	Positive	74	No	52	3	3	II	II	Negative	Positive	Positive
701193	Positive	49	Yes	44	3	0	II	II	Negative	Positive	Positive
701315	Positive	55	Yes	51	1	4	III	II	Negative	Negative	Negative
701487	Positive	15	Yes	47	3	4	III	II	Negative	Positive	Positive
701639	Positive	73	No	54	2	0	I	II	Negative	Positive	Positive
701691	Positive	74	No	47	3	19	III	II	Negative	Positive	Negative
701692	Negative	74	No	56	1	1	II	II	Negative	Positive	Negative
701875	Positive	73	No	50	3	6	III	II	Negative	Positive	Negative
701878	Positive	73	No	44	1.5	0	I	II	Negative	Negative	Negative
701911	Positive	73	No	47	2	2	II	II	Negative	Positive	Negative
702263	Positive	73	No	71	2	0	I	II	Negative	Positive	Negative
702316	Positive	44	Yes	59	4	4	II	II	Negative	Positive	Negative
702508	Positive	73	No	50	1	0	I	II	Negative	Positive	Positive
703084	Positive	56	Yes	51	3	0	II	II	Negative	Positive	Negative
703712	Positive	26	Yes	68	2	1	II	II	Negative	Positive	Negative
703768	Positive	72	No	42	5	6	III	II	Negative	Positive	Negative
703809	Positive	20	Yes	54	1,5	15	III	II	Negative	Positive	Positive
703841	Negative	67	Yes	43	2	5	III	II	Negative	Positive	Positive
704064	Positive	49	Yes	63	3	0	II	II	Negative	Positive	Negative
704152	Positive	72	No	44	3	0	II	II	Negative	Positive	Negative
704189	Negative	72	No	37	3	0	II	II	Negative	Positive	Negative
704286	Positive	72	No	48	2	0	I	II	Negative	Positive	Positive
704343	Positive	71	No	43	2.5	0	II	II	Negative	Positive	Positive
704473	Positive	71	No	54	2	0	II	II	Negative	Positive	Positive
704487	Positive	71	No	42	3	0	II	II	Negative	Positive	Positive
704542	Negative	71	No	47	3	0	II	II	Negative	Positive	Positive
704604	Negative	71	No	38	3	1	II	II	Negative	Positive	Positive
704642	Positive	71	No	50	1.5	4	III	II	Negative	Positive	Negative
705017	Positive	71	No	55	1.5	0	I	II	Negative	Positive	Negative
705382	Positive	71	No	43	3	0	II	II	Negative	Positive	Negative
705385	Positive	71	No	51	5	2	II	II	Negative	Positive	Negative
705468	Positive	71	No	43	3.5	3	II	II	Negative	Positive	Positive
705605	Positive	25	Yes	50	3.5	9	III	II	Negative	Positive	Negative
707372	Positive	20	Yes	52	3	7	III	II	Negative	Positive	Negative
707925	Positive	69	No	62	5	19	III	II	Negative	Positive	Positive
708362	Negative	69	No	43	2.5	0	II	III	Negative	Positive	Negative
708516	Positive	29	Yes	59	5	28	III	II	Negative	Positive	Positive
708663	Positive	33	Yes	50	2	14	III	II	Negative	Positive	Positive
708685	Positive	69	No	53	5	0	II	II	Negative	Positive	Positive
708827	Positive	69	No	48	3	4	III	II	Negative	Positive	Positive
708947	Positive	3	Yes	52	5	15	III	II	Negative	Positive	Positive
709410	Positive	23	Yes	54	2.5	0	II	III	Negative	Positive	Positive
710061	Positive	27	Yes	58	3	17	III	II	Negative	Positive	Positive
710157	Positive	68	No	43	4	0	II	III	Negative	Positive	Positive
710401	Positive	22	Yes	32	3	11	III	II	Negative	Positive	Positive
710405	Positive	68	No	60	2.5	0	II	II	Negative	Positive	Negative
710406	Positive	68	No	60	2	0	I	II	Negative	Positive	Positive
710666	Negative	64	No	52	2	3	II	III	Negative	Positive	Positive
710756	Negative	67	No	51	2	0	I	II	Negative	Negative	Negative
710839	Positive	68	No	44	3	0	II	II	Negative	Negative	Negative
710853	Positive	68	No	51	3.5	0	II	II	Negative	Positive	Negative
711099	Positive	67	No	47	3	1	II	II	Negative	Positive	Negative
711178	Positive	55	Yes	38	3	0	II	II	Negative	Positive	Negative
711187	Positive	67	No	48	3	0	II	II	Negative	Positive	Negative
711301	Negative	67	No	50	5	0	II	II	Positive	Positive	Positive
711320	Positive	67	No	69	2.5	0	II	III	Negative	Positive	Positive
711392	Positive	67	No	55	3	3	II	III	Positive	Positive	Negative
711396	Positive	67	No	59	2.5	0	II	II	Negative	Positive	Negative
711505	Positive	67	No	49	1	3	II	II	Negative	Negative	Negative
711635	Negative	67	No	36	1.3	0	I	II	Negative	Positive	Positive
712538	Positive	66	No	30	3	0	II	II	Negative	Positive	Positive
712749	Negative	66	No	62	2.5	0	II	II	Negative	Positive	Positive
713902	Positive	63	No	58	2	1	II	II	Negative	Positive	Positive
714813	Positive	65	No	32	2	0	I	II	Negative	Positive	Positive
715049	Positive	64	No	55	2.5	1	II	II	Negative	Positive	Negative
715797	Negative	64	No	50	2	0	II	II	Negative	Positive	Negative
716187	Positive	64	No	47	2.5	0	II	III	Negative	Positive	Negative
716385	Negative	64	No	48	1	19	III	II	Negative	Positive	Positive
716500	Positive	64	No	66	2	0	I	II	Negative	Positive	Negative
716842	Positive	63	No	54	2	0	I	II	Negative	Positive	Positive
716967	Negative	63	No	57	1.5	0	I	II	Negative	Negative	Positive
717107	Positive	18	Yes	30	2	0	I	II	Negative	Positive	Negative
717377	Negative	63	No	32	2	1	II	II	Negative	Positive	Negative
