# Supplementary figures and images for: PSAT1 is regulated by ATF4 and enhances cell proliferation via the GSK3β/β-catenin/cyclin D1 signaling pathway in ER-negative breast cancer
Source: Springer Nature journal article supplement (doi:10.1186/s13046-017-0648-4), 2017-12-01

**A**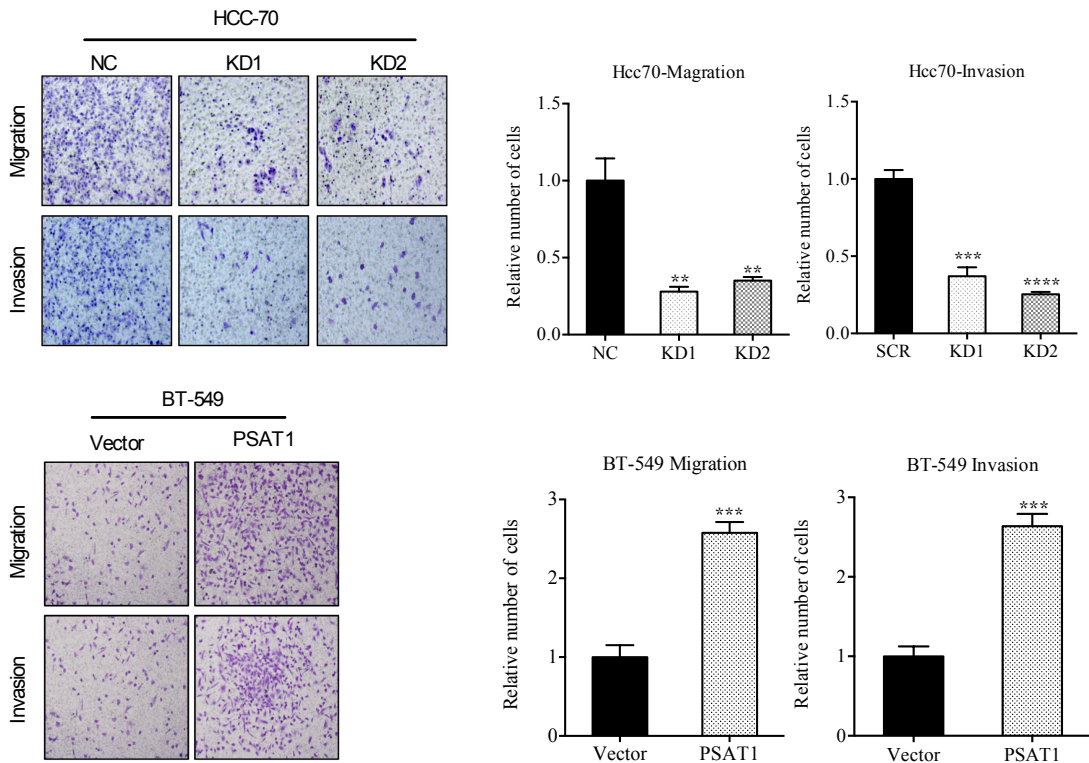**B**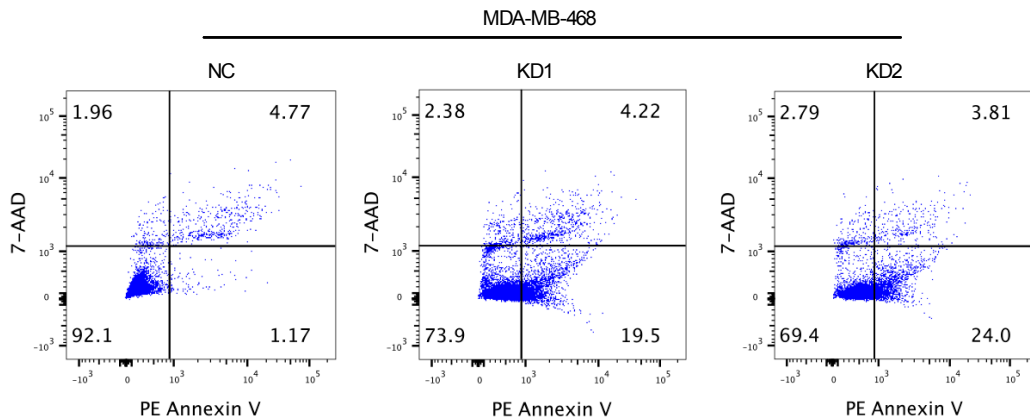

Supplement: MOESM2 [file 15290708]
